1 **Lmo7a Coordinates Neural Crest Migration and Lineage Specification by Regulating Cell Adhesion**

2 **Dynamics**

3

4

5 David Tatarakis<sup>1</sup>, Adam Tuttle<sup>1,2</sup> and Thomas F. Schilling<sup>1</sup>

6

7 Department of Developmental and Cell Biology, University of California, Irvine CA<sup>1</sup>

8 Department of Cell, Developmental, and Cancer Biology, Oregon Health Sciences University, Portland

9 Oregon<sup>2</sup>

10

11

12

13

14

15 Author for Correspondence: Thomas F. Schilling, 4109 Natural Sciences II, Department of Developmental  
16 and Cell Biology, University of California, Irvine, CA 92617. Email: [tschilli@uci.edu](mailto:tschilli@uci.edu)

17

18

19 Key Words: Danio rerio, neural crest, focal adhesion, Wnt

20

21 **ABSTRACT**

22  
23 Cell migration requires dynamic regulation of cell-cell signaling and cell adhesion. Neural crest (NC) cells  
24 are highly migratory cells, which undergo an epithelial-mesenchymal transition (EMT) to leave the neural  
25 epithelium and migrate throughout the body to give rise to many different derivatives. We have identified  
26 a Lim-domain only (Lmo) protein, Lmo7a, expressed in early NC cells that controls both actin cytoskeletal  
27 dynamics and Wnt signaling during NC migration. In embryos deficient in Lmo7a, many NC cells fail to  
28 migrate away from the dorsal midline, and form aggregates. Unlike the majority of NC cells that appear to  
29 migrate normally, cells that aggregate in Lmo7a-deficient embryos mislocalize paxillin (Pxn) and have  
30 reduced levels of phosphorylated focal adhesion kinase (pFAK). Lmo7a loss-of-function also disrupts  
31 canonical Wnt signaling such that after the onset of NC cell migration, Wnt responses and nuclear  $\beta$ -  
32 catenin levels increase in the cells that aggregate. However, this increase in Wnt signaling appears  
33 secondary to the defect in migration. Similar to mutants for other Wnt regulators in NC cells, the NC cells  
34 in Lmo7a-deficient aggregates exhibit gene expression signatures of pigment cell progenitors, but also  
35 express markers of Schwann cell progenitors, suggesting a role for Lmo7a in pigment-glia specification.  
36 We propose that Lmo7a modulates cell adhesion to facilitate both robust NC cell migration and a subset  
37 of lineage decisions.

## 38 INTRODUCTION

39 During embryonic development, cell migration and lineage specification must be tightly coordinated. Many  
40 of the mechanisms driving progenitor cell migration also regulate differentiation toward specific lineages  
41 (McBeath et al, 2004; He et al, 2018). In vertebrates, this is particularly true for mesenchymal cell  
42 populations such as migratory neural crest (NC) cells, which emerge from the neural ectoderm and  
43 disperse to generate an extraordinary variety of cell types throughout the body including neurons, glia,  
44 pigment cells, cartilage, and bone. Despite extensive studies of both intrinsic and extrinsic factors that  
45 specify these different fates, how the acquisition of distinct NC lineages relate to their migratory behaviors  
46 remains largely unclear (Kalcheim and Kumar, 2017).

47 NC cells are induced at the neural plate border during neural tube closure through a combination  
48 of Wnt, BMP, FGF, and Notch signaling (Stuhlmiller and Garcia-Castro, 2012). They subsequently  
49 undergo epithelial-mesenchymal transition (EMT) and migrate away from the dorsal midline along distinct  
50 trajectories throughout the embryo (Kerosuo and Bronner-Fraser, 2012; Mayor and Theveneau, 2013).  
51 Among these migratory paths, are cranial NC cell streams that populate the pharyngeal arches (PAs) to  
52 form the facial skeleton, as well as distinct lateral and medial pathways in the trunk in which NC cells form  
53 pigment cells in the skin or sensory neurons and glia in peripheral nerves, respectively. Some in vivo  
54 lineage tracing and in vitro clonal analyses have suggested that these fates depend entirely on the  
55 migratory environments and final destinations of NC cells (Fraser and Bronner-Fraser, 1991; Dupin et al,  
56 2010; Baggiolini et al, 2015). Other experiments have provided evidence for early lineage specification in  
57 premigratory NC and a link between initial position, migratory path, and cell fate (Stemple and Anderson,  
58 1992; Schilling and Kimmel, 1994; Krispin et al 2010). In recent years, the advent of single cell  
59 transcriptomics has given us a more detailed picture of the degree to which NC cell fates are both  
60 dynamic and heterogeneous during migration (Morrison et al, 2017; Lukoseviciute et al, 2018; Soldatav et  
61 al, 2019).

62 Canonical Wnt signaling plays important roles in inducing NC cells, promoting their migration, and  
63 driving lineage decisions at later stages. Tight regulation of signaling levels is vital for proper initiation of  
64 migration (Maj et al, 2016; Hutchins and Bronner, 2018; Ahsan et al., 2019) and also biases cells toward  
65 pigment versus glial cell fates through regulation of genes such as *Sox10/Foxd3* and *Pax3/7*, respectively

66 (Dorsky et al., 1998; Minchin and Hughes, 2008; Curran et al, 2010). We previously demonstrated novel  
67 roles for *Ovol1a* and *Rbc3a/Dmxl2* in promoting NC migration, due at least in part to changes in  
68 responses to Wnt signaling (Piloto and Schilling, 2010; Tuttle et al, 2014). Both are specifically expressed  
69 in premigratory NC cells, and loss-of-function of either gene disrupts the migration of subsets of NC cells,  
70 which form aggregates in the dorsal midline and acquire pigment cell fates. *Ovol1a* is a direct Wnt target  
71 (Li et al, 2002), while *Rbc3a/Dmxl2* controls Wnt receptor trafficking, and both alter the localization of  
72 cadherins (such as *Cdh2*) important for migration. These results establish a link between adhesive  
73 mechanisms that govern NC migration, Wnt signaling, and the decisions that lead toward specific cell  
74 fates.

75 In a microarray screen to identify genes downregulated in *tfa2a/g*-deficient zebrafish embryos,  
76 we discovered the Lim-domain-only 7 gene *lmo7a* (Hoffman et al. 2007, Tuttle et al., 2014). Lim-domain  
77 proteins vary in structure and cellular function and include the Lim-domain-only (Lmo) subclass. Lmo1-4  
78 contain no annotated functional domains apart from multiple Lim domains and function as nuclear  
79 transcriptional co-regulators important in cancer progression (Matthews et al, 2013; Sang et al, 2014).  
80 Lmo4 promotes EMT of NC and neuroblastoma cells through direct binding to Snail and Slug transcription  
81 factors (Ochoa et al, 2012; Ferronha et al, 2013). A protein containing four and one-half Lim domains  
82 (FHL2) interacts with  $\beta$ -catenin ( $\beta$ -cat) to either increase or decrease levels of TCF/LEF dependent  
83 transcription, depending on the cellular context (Martin et al, 2002; Hamidouche et al, 2008). Other Lim-  
84 domain family members contain multiple functional domains and have more divergent roles.

85 Lmo7, despite its name, contains a calponin homology (CH) domain, a PDZ domain, and a single  
86 Lim domain. In mammals, multiple functions have been described for Lmo7, including promoting  
87 expression of myogenic transcription factors in skeletal muscle cells (Holaska et al, 2006; Dedeic et al,  
88 2011) and regulating afadin-nectin-E-cadherin junctions in epithelial cells (Ooshio et al, 2004) and in the  
89 cuticular plate of the cochlea (Du et al, 2019). Interestingly, its function in myogenesis requires entry into  
90 the nucleus and transcriptional regulation, while its epithelial functions involve interactions with the actin  
91 cytoskeleton and membrane-associated proteins. Lmo7 also influences cancer cell metastasis, such as  
92 the expression of myocardin-related transcription factors through regulation of Rho-dependent actin  
93 dynamics at the cell membranes of breast cancer cells (Nakamura et al, 2005; Hu et al, 2011, Teixeira et

94 al, 2014). A paralog of Lmo7, LIMCH1, regulates cell migration through roles in focal adhesion (FA)  
 95 formation and actomyosin dynamics (Lin et al, 2017). Lmo7 can localize to FAs and act as a shuttling  
 96 protein to mediate integrin signaling in HeLa cells and mouse embryonic fibroblasts (Holaska et al, 2006;  
 97 Wozniak et al, 2013). Both LIMCH1 and Lmo7 are associated with poor prognosis in human lung cancer  
 98 (Karlsson et al, 2018), and expression of Lmo7 (also called PCD1) is associated with increased  
 99 metastasis in numerous human cancers (Kang et al, 2000; Furuya et al, 2002; Sasaki et al, 2003).

100 Here, we show that zebrafish Lmo7a promotes NC migration and modulates lineage decisions  
 101 through interactions with canonical Wnt signaling, similar to *Ovo1a* and *Rbc3a/Dmxi2*. Lmo7a is  
 102 expressed in premigratory NC cells where it localizes to cell membranes, and loss-of-function leads to  
 103 aggregation of subsets of NC cells at the dorsal midline. These cells show elevated nuclear  $\beta$ -cat as well  
 104 as altered paxillin (Pxn) localization and reduced phosphorylated focal adhesion kinase (pFAK).  
 105 Furthermore, analysis of gene expression in these NC cell aggregates reveals that the cells adopt  
 106 identities of pigment and glial progenitors, but not other NC lineages. Our results suggest that Lmo7a has  
 107 a dual role in promoting migration of NC cells and regulating lineage decisions through modulation of  
 108 canonical Wnt signaling and cell adhesion dynamics.

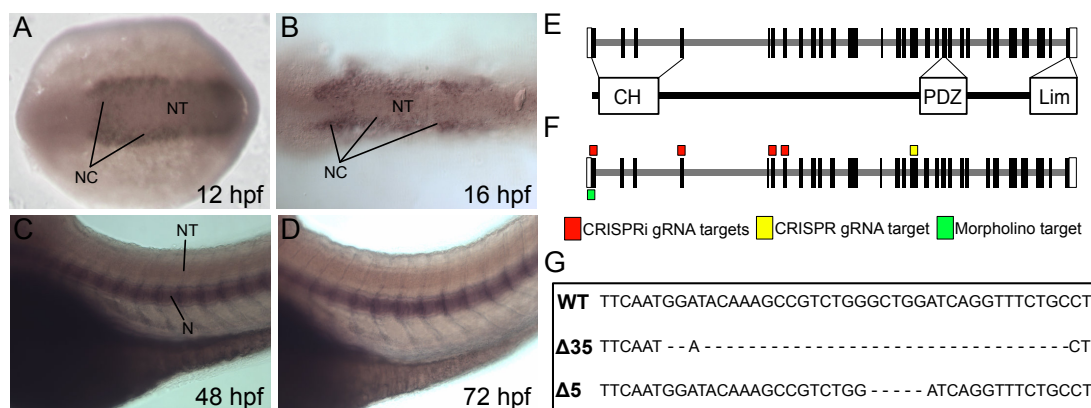

109

110

111 **RESULTS**

112 ***Lmo7a* is expressed in and required for migration of subsets of NC cells**

113 Zebrafish *lmo7a* was identified in a microarray screen of *tfap2a/g*-deficient embryos, which lack NC cells  
 114 (Hoffman et al., 2007; Tuttle et al., 2014). Whole mount in situ hybridization (ISH) first detected *lmo7a*  
 115 expression in cranial NC cells at 12 hours post-fertilization (hpf), just prior to the onset of NC cell  
 116 migration (Figure 1A). Expression persisted at 16 hpf in migrating NC cells in the PAs and between the  
 117 eyes (Figure 1B), but was no longer detected at 24 hpf. At later embryonic stages (48-72 hpf), expression  
 118 was restricted to the notochord and somite boundaries (Figure 1C, D).

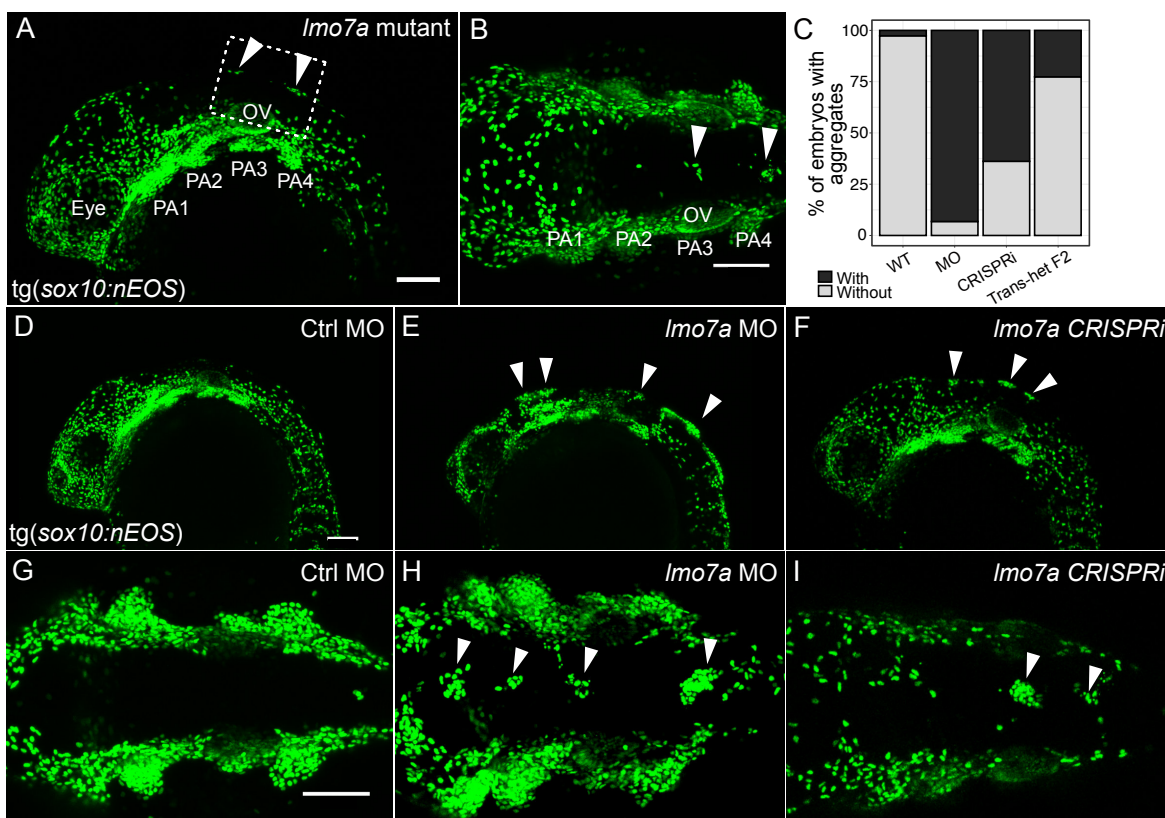

**Figure 2: *Lmo7a* knockdown disrupts migration of subsets of NC cells. (A-B, D-I)** Whole mount live confocal images of 24 hpf *sox10:nEOS* embryos. **(A-B)** NC aggregates form along the dorsal midline in *lmo7a* trans-heterozygous mutants, in contrast to WT siblings. **(C)** Percentages of embryos displaying >10 NC cells at the dorsal midline in various *lmo7a* gene perturbations. **(D,G)** Embryos injected with 4 ng of control morpholino (MO). **(E,H)** Embryos injected with 4 ng of antisense MO targeting *lmo7a* **(F,I)** Embryos injected with *dCas9* mRNA and 4 gRNAs targeting the coding region of *lmo7a*. NC cell aggregates at the dorsal midline (arrowheads). **(A, D-F)** Lateral views. **(B, G-I)** Dorsal views. Scale bars = 100  $\mu$ m **(A,B,D,G)**. PA=Pharyngeal Arch, OV=Otic Vesicle



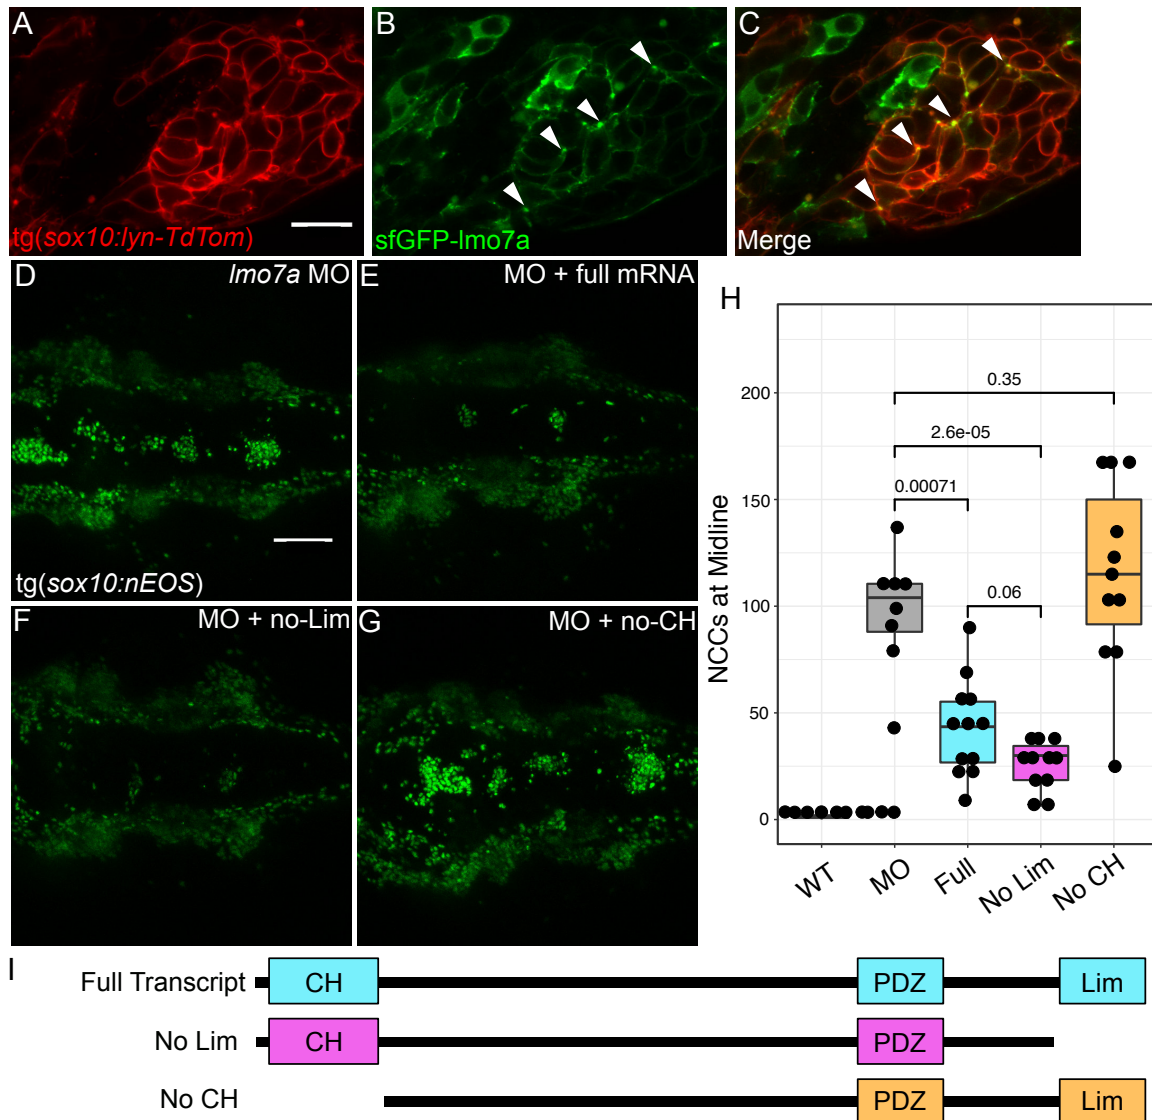

119 Lmo7a contains CH, PDZ and Lim domains (Figure 1E). Two deletions in *lmo7a*, -5 bp and -35  
 120 bp, were generated by CRISPR-Cas9 gene editing using a guide RNA targeting exon 16 just upstream of  
 121 the PDZ domain (Figure 1F, G). Trans-heterozygous mutants carrying the *Tg(-4.9sox10:nEOS)* transgene  
 122 (hereafter referred to as *sox10:nEOS*, which labels the nuclei of pre-migratory and migrating NC cells)  
 123 appeared largely normal but NC cells formed small aggregates (5-10 cells/aggregate; ~10-20

124 cells/embryo) at the dorsal midline of the neural tube extending along the anterior-posterior (A-P) axis  
125 from the midbrain-hindbrain boundary to the anterior spinal cord (Figure 2A,B). Such aggregates closely  
126 resemble the phenotypes of *rbc3a*<sup>-/-</sup> and *ovo1a*-deficient embryos (Piloto et al, 2010 ; Tuttle et al., 2014).

127 Similar to *lmo7a* mutants, knockdown of *lmo7a* using an antisense morpholino targeting the  
128 translation start site (*lmo7a*-MO) (Figure 1H) in *sox10:nEOS* fish resulted in NC aggregates (5-30  
129 cells/aggregate; ~50-100 cells/embryo) at the dorsal midline in ~93% of injected embryos compared to  
130 sibling embryos injected with a control MO (Figure 2D-E,G-H). Aggregates became distinct by 18 hpf  
131 while other surrounding NC cells migrated away from them and ventrally into the PAs at approximately  
132 the same rate as WT cells (Suppl Movie 1-2). CRISPR inhibition (CRISPRi) produced similar NC cell  
133 aggregates in ~64% of injected embryos (Figure 2F,I). With CRISPRi, expression of *lmo7a* at 12 hpf was  
134 nearly undetectable (Figure S1). These results provide independent confirmation that *Lmo7a* function is  
135 required for subsets of NC cells to migrate.

136

### 137 ***Lmo7a* localizes to NC cell membranes and its function requires the calponin homology domain**

138 *Lmo7* was previously shown to function at the membrane in epithelial cells where it interacts with  
139 adherens junctions and/or focal adhesions (FAs), and in the nucleus in muscle cells, where it binds the  
140 transcription factor Emerin (Ooshio et al, 2004; Wozniak et al, 2013; Holaska et al, 2006). To determine  
141 the subcellular localization of *Lmo7a* in NC cells, we generated a fusion construct encoding superfolder  
142 GFP (sfGFP) fused to the N-terminus of *Lmo7a*, *sfGFP-lmo7a*. This mRNA was injected at the 1-cell  
143 stage into *Tg(-4.9sox10:lyn-tdTomato)* embryos (hereafter referred to as *sox10:lyn-tdTom*) to mark NC  
144 cell membranes. At 18 hpf, the *sfGFP-lmo7a* fusion protein was restricted to bright puncta that co-  
145 localized with *sox10:lyn-tdTom*, with little to no expression detected in cell nuclei (Figure 3A-C), indicating  
146 a potential role at the membrane.

147 *Lmo7a* contains CH, PDZ and Lim domains, all implicated in protein-protein interactions (Figure  
148 1G). To test requirements for these domains in NC cell migration, rescue experiments were performed in  
149 an *lmo7a*-MO background. Co-injection of *lmo7a*-MO with mRNA encoding full-length *lmo7a* significantly  
150 reduced the severity of the migration phenotype as quantified by the number of NC cells that failed to  
151 migrate away from the midline by 24 hpf (MO median = 104 cells/embryo, MO+*lmo7a*-full median = 43.5



152 cells/embryo;  $p < 0.001$ ) (Figure 3D, E, H). Next, mRNAs encoding full-length *lmo7a* lacking either the Lim  
153 or the CH domain were co-injected with *lmo7a*-MO. Interestingly, removal of the Lim domain caused no  
154 significant change in the ability of injected *lmo7a* mRNA to rescue the *lmo7a*-MO phenotype (MO+*lmo7a*-  
155 *noLim* median = 30 cells/embryo;  $p < 0.0001$ ) while *lmo7a* lacking the CH domain failed to rescue  
156 (MO+*lmo7a*-full median = 115 cells/embryo;  $p = 0.35$ ) (Figure 3F, G, H). The CH domain mediates  
157 interactions with the actin cytoskeleton. These data suggest that the CH domain but not the Lim domain is  
158 required for *lmo7a*'s function in early NC cell migration, further supporting a role for Lmo7a at the  
159 membrane in NC cells and potential interactions with the cytoskeleton.

160

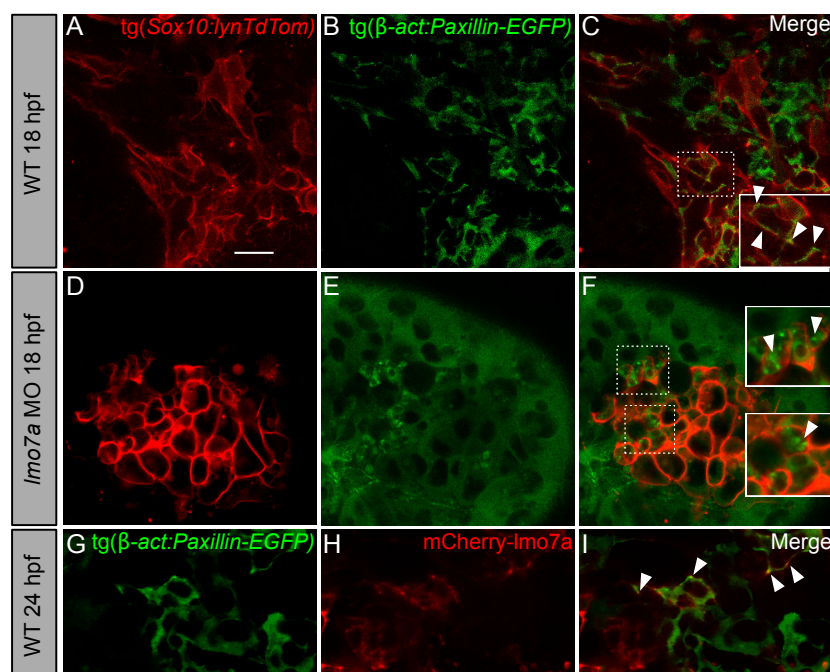

**Figure 4: *lmo7a* knockdown results in abnormal NC cell morphology and aggregation of paxillin complexes.** (A-F) Whole mount live confocal images of *Tg(sox10:lyn-tdTomato; β-actin:paxillin-EGFP)* double transgenic embryos. (A-C) NC cells at 18 hpf display long cytoplasmic protrusions (filopodia) and localization of Paxillin-EGFP along the plasma membrane (arrowheads) in WT. (D-F) NC cells in dorsal midline aggregates in embryos injected with *lmo7a*-MO. Cells are rounded and accumulate Paxillin-EGFP in the cytoplasm. (G-I) Whole mount live confocal images of transgenic *β-actin:paxillin-EGFP* embryos injected with *mCherry-lmo7a* mRNA. *mCherry-lmo7a* puncta colocalize with Paxillin-EGFP in WT NC cells at 24 hpf (I) (arrowheads). Scale bar = 15 μm

61 **NC cells in *lmo7a*-deficient**  
62 **embryos have aberrant**  
63 **accumulation of focal**  
64 **adhesion components**

65 Based on its membrane  
66 localization in NC cells and  
67 known roles in FAs (Holaska  
68 et al, 2006; Wozniak et al,  
69 2013), we hypothesized that  
70 *lmo7a* likely plays a role in  
71 FAs essential for proper  
72 filopodial dynamics and  
73 migration. To test this idea we  
74 next examined filopodial  
75 extension and FA formation.

176 We utilized a double

177 transgenic line expressing both a fluorescent paxillin (Pxn) fusion protein under the control of a ubiquitous  
178 promoter, *Tg(β-actin:Pxn-EGFP)* as well as *sox10:lynTdTomo* to facilitate live, time-lapse imaging of  
179 Pxn-based adhesion complexes in NC cells. Embryos were imaged from 16-19 hpf, when cranial NC cells

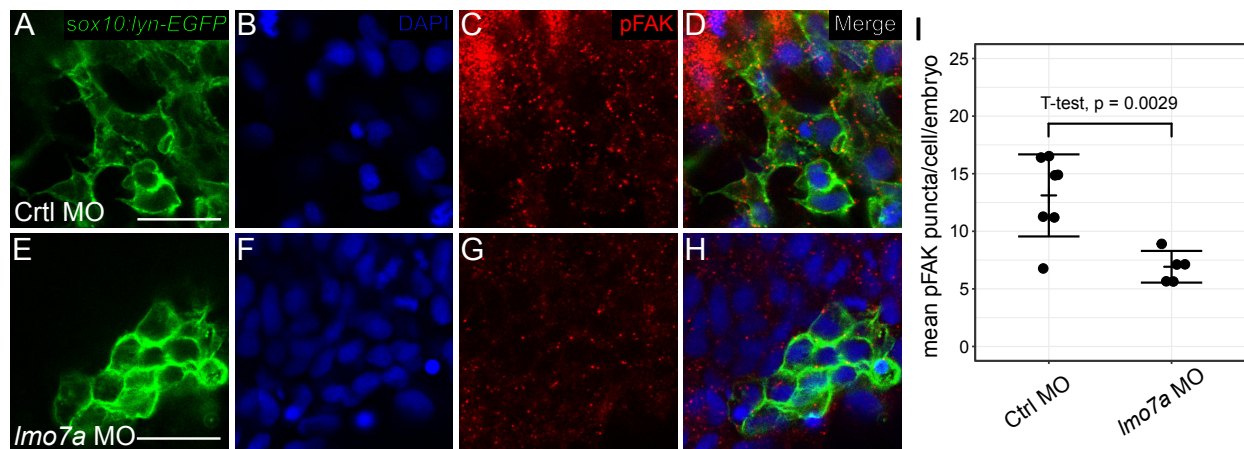

**Figure 5: *Imo7a*-deficient NC aggregates have decreased levels of phosphorylated focal adhesion kinase.** (A-H) Whole mount confocal images of immunostaining with anti-pFAK antibody (red) and DAPI (blue) in *sox10:lynEGFP* transgenic embryos (green). (A-D) Migratory cells in Ctrl MO-injected embryos show many bright pFAK puncta along their membranes. (E-H) Aggregate NC cells in *Imo7a* MO-injected embryos show fewer pFAK puncta in their membranes. (I) Dots represent the mean number of puncta per cell in 5 cells per embryo. (Ctrl MO n=7 embryos, mean=13.1 puncta/cell/embryo; *Imo7a* MO n=5 embryos, mean=6.2 puncta/cell/embryo). T-test p-value = 0.0029. Line indicates mean. Error bars indicate  $\pm$ SD. Scale bars = 20  $\mu$ m.

180 migrate into the PAs. In WT embryos, NC cells dynamically change morphology as they migrate,  
181 extending and retracting filopodia. Transient accumulations of Pxn-EGFP were visible along the  
182 membranes of these NC cells during migration (Figure 4A-C). In contrast, in *Imo7a*-deficient embryos, NC  
183 cells in aggregates that remained at the midline maintained a rounded morphology with few to no  
184 filopodial projections and contained large aggregates of Pxn-EGFP that appeared cytoplasmic (Figure  
185 4D-F; Suppl Movie 3). To investigate if *Lmo7a* colocalizes with Pxn, we injected *mCherry-Lmo7a* mRNA  
186 into WT *tg(B-actin:Pxn-EGFP)* embryos. Overlap of mCherry-*Lmo7a* puncta and Pxn-EGFP puncta was  
187 observed at the membranes of migratory WT NC cells (Figure 4G-I). These observations suggest that in  
188 *Imo7a*-deficient embryos, Pxn-FA complexes fail to form properly at the membrane and that NC cells  
189 consequently fail to extend directional projections that facilitate migration.

190 To investigate if this Pxn accumulation is indicative of changes in FA dynamics, we examined  
191 localization of phosphorylated Focal Adhesion Kinase (pFAK) using a polyclonal anti-pFAK (pY576)  
192 antibody. At 18 hpf, many bright puncta can be seen along the membranes of migrating NC cells in  
193 embryos injected with a control MO (Ctrl MO) (Figure 5A-D). While some puncta can be seen in the  
194 membranes of midline aggregate NCs in *Imo7a*-MO-injected embryos (Figure 5E-H), the number of

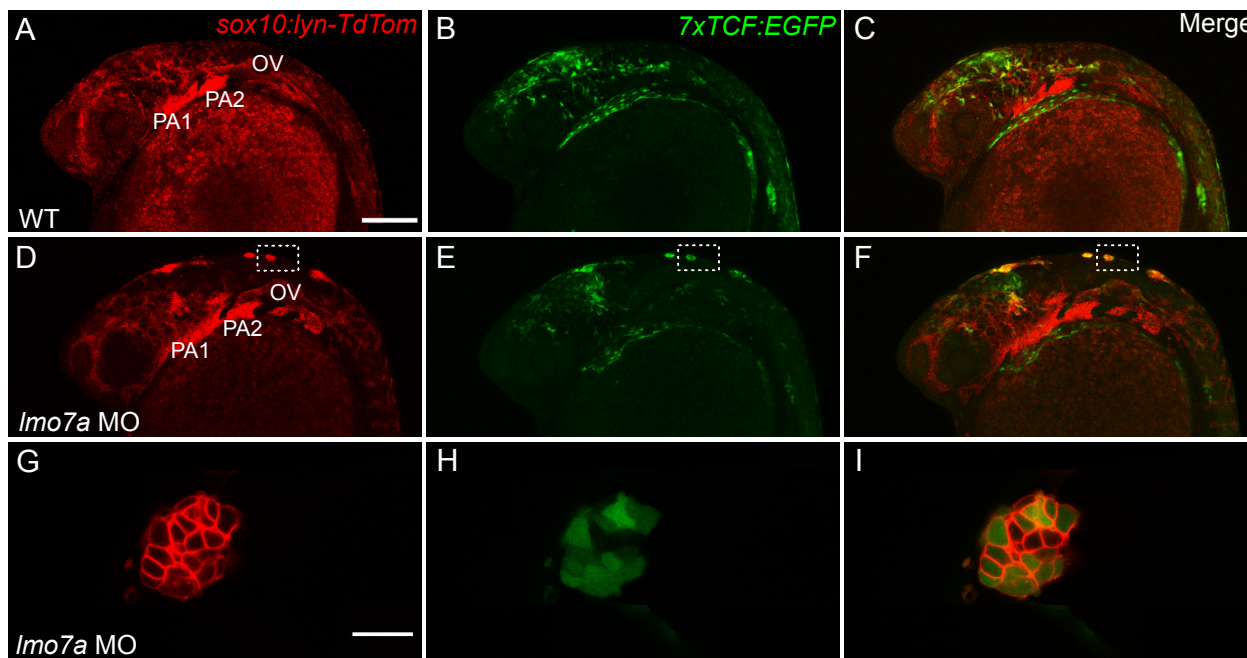

**Figure 6: *lmo7a* knockdown increases canonical Wnt signaling in NC midline aggregates.** Whole mount live confocal images of double transgenic *Tg(sox10:lyn-tdTomato; 7xTCF:EGFP)* embryos at 24 hpf. **(A-C)** In WT embryos, EGFP is detected in migratory NC cells around the midbrain, anterior hindbrain and PAs 1 and 2. **(D-F)** In *lmo7a* MO injected embryos EGFP is detected in NC aggregates at the dorsal midline regardless of anterior-posterior position. **(G-I)** At higher magnification, most cells within each aggregate are positive for EGFP. **(A-F)** Lateral views. **(G-I)** Dorsal view. Scale bars = 150  $\mu$ m **(A-C)** 25  $\mu$ m **(G-I)** and 15  $\mu$ m **(J-N)**. PA=Pharyngeal Arch, OV=Otic Vesicle

195 puncta per cell was significantly lower than controls (Ctrl MO mean = 13.1/cell/embryo, *lmo7a* MO mean  
196 = 6.92/cell/embryo,  $p=0.0029$ ) (Figure 5I).

197

### 198 ***Lmo7a* deficiency elevates canonical Wnt signaling in NC cell aggregates**

199 We have previously shown that *Ovol1a* and *Rbc3a/Dmxl2* regulate NC cell migration, at least in part, by  
200 regulating canonical Wnt signaling (Piloto et al. 2010; Tuttle et al. 2014). To investigate if the NC  
201 migratory defects observed in *lmo7a*-deficient embryos also alter Wnt signaling, we examined a canonical  
202 Wnt reporter line, *Tg(7xTCF:EGFP)*. In WT embryos, cranial NC cells in PA1 and PA2 as well as over the  
203 midbrain expressed the Wnt reporter at 24 hpf (Figure 6A-C). In contrast, most of the NC cells within  
204 aggregates in *lmo7a*-deficient embryos were TCF-GFP-positive, regardless of their A-P position (Figure  
205 6D-F). Levels of Wnt responses varied dramatically between cells within an aggregate (Figure 6G-I).



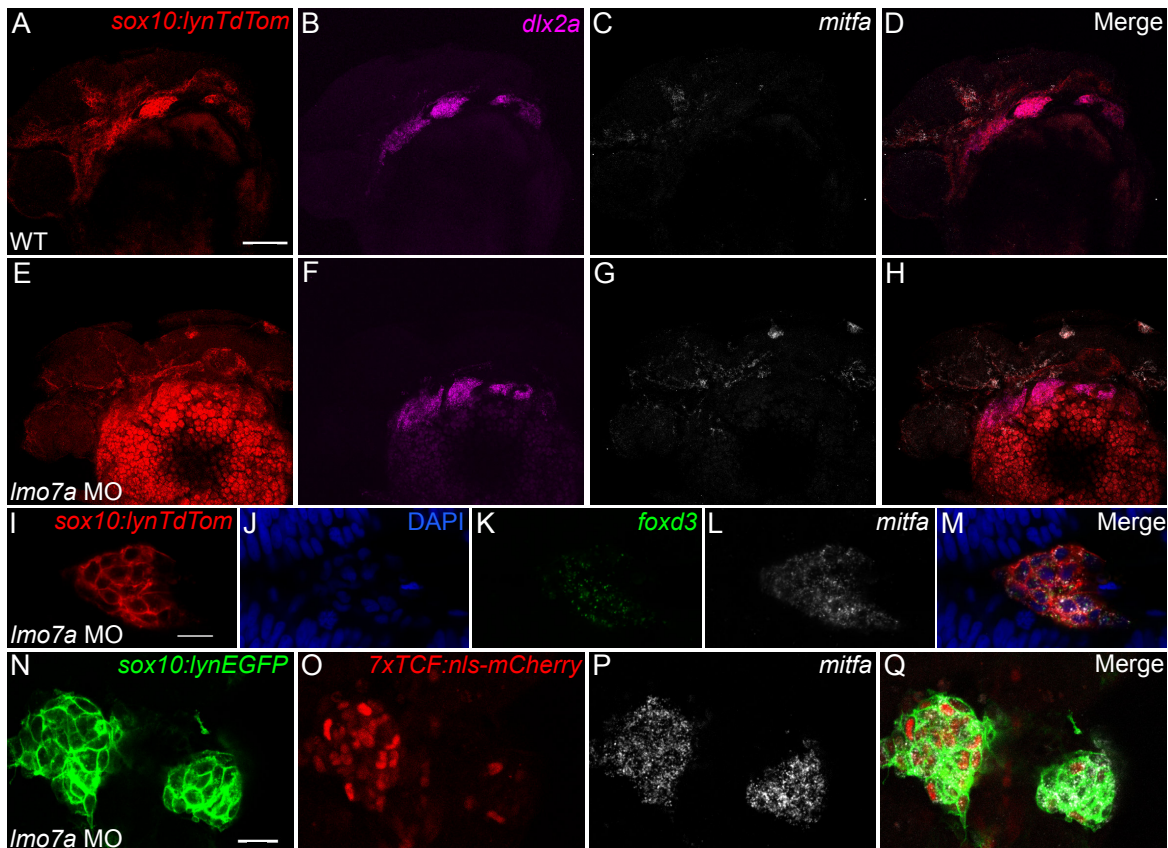

**Figure 7: NC aggregates adopt a bipotential pigment/glia cell fate.** (A-H) Whole mount confocal images of in situ hybridization chain reaction (HCR) for NC lineage markers in transgenic *Tg(sox10:lyn-tdTomato)* embryos. (A-D) In WT embryos, *dlx2a* is expressed in NC cells within the PAs and *mitfa* expression is observed in many NC cells outside the PAs. (E-H) In *Imo7a* MO-injected embryos, *dlx2a* expression is unaffected, but *mitfa* expression marks NC aggregates at the dorsal midline. (I-M) Whole mount confocal images of HCR for NC lineage markers. (I) NC aggregates in *Imo7a* MO-injected embryos express both the glial progenitor marker *foxd3* (J) and the melanocyte progenitor marker *mitfa* (L), and some cells co-express both markers (M). (N-Q) Whole mount confocal images of HCR for NC lineage markers in *Imo7a* MO-injected double transgenic *Tg(sox10:lyn-EGFP; 7XTCF:nls-mCherry)*. Both mCherry+ and mCherry- NC cells in midline aggregates express *mitfa*. Scale bars = 100  $\mu$ m (A) 15  $\mu$ m (I) and 20  $\mu$ m (N).

206 To confirm the apparent increase in canonical Wnt signaling, we analyzed the subcellular  
 207 localization of  $\beta$ -cat in WT and *Imo7a*-deficient NC cells at 24 hpf (Figure S2A-H). Similar to our previous  
 208 results for *Ovol1a* and *Rbc3a*, in *Imo7a*-deficient embryos, NC cells in the midline aggregates displayed  
 209 increased levels of  $\beta$ -cat in the nucleus as compared to WT NC cells (Figure S2I).

#### 210 ***Imo7a*-deficient NC cell aggregates co-express pigment and glia markers**

211 Increased canonical Wnt signaling can drive NC cells toward pigment cell fates (Curran et al, 2010). To  
 212 determine if this is the case in NC aggregates in *Imo7a*-deficient embryos, we performed in situ  
 213 Hybridization Chain Reaction (HCR) for genes that mark different NC lineages at 24 hpf (Figure 7). In  
 214 *Imo7a*-MO injected embryos, expression of the skeletogenic marker *dlx2a* was restricted to the PAs,  
 215 similar to WT, and was excluded from midline NC aggregates (Figure 7B, F). In contrast, all of these

216 aggregates expressed *mitfa*, which labels melanocyte progenitors (Figure 7C, G). These results suggest  
217 that elevated canonical Wnt signaling in NC cells that aggregate at the midline in *lmo7a*-deficient embryos  
218 promotes their differentiation as pigment cells, similar to our previous results for *Ovol1a* and *Rbc3a*/  
219 *Dmxl2*.

220 However, surprisingly, NC aggregates in *lmo7a*-deficient embryos were also positive for *foxd3*  
221 mRNA, which at this stage in WT marks Schwann cell precursors (Figure 7I-M). Furthermore, many NC  
222 cells within an aggregate clearly co-expressed both *mitfa* and *foxd3*. Wnt signaling promotes *Mitf* and  
223 represses *Foxd3* in the context of lineage specification (Curran et al, 2010) Therefore, to assess the Wnt  
224 responses occurring in these apparent bipotential *mitfa/foxd3* double-positive NC cells we examined their  
225 expression of *7xTCF:nls-mCherry*. Although expression is mosaic in the NC aggregates of *lmo7a*-  
226 deficient embryos (Figure 7N-O), all mCherry- cells also expressed *mitfa* (Figure 7P). To investigate this  
227 further, we treated *lmo7a*-deficient embryos with a canonical Wnt inhibitor, XAV939 from 12-24 hpf, during  
228 NC migration but after NC induction (Figure S3). While the treatments drastically reduced levels of the  
229 Wnt reporter (Figure S3A-F), they did not significantly alter either the number of NC cells that aggregate  
230 at the midline (DMSO mean = 28.8, XAV939 mean = 19.9, p=0.11) (Figure S3G) or that express *mitfa*  
231 (Figure S3H-M). These results suggest that elevated canonical Wnt signaling is unlikely to be the primary  
232 cause of either aberrant NC migration or the fates of NC cells in the absence of *Lmo7a* function and may  
233 instead be secondary to the cytoskeletal functions of *Lmo7a*.

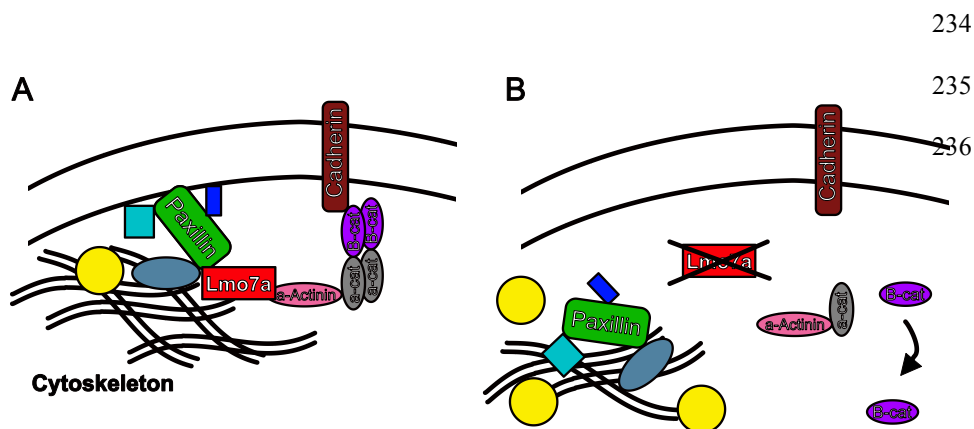

**Figure 8. Hypothetical model for *Lmo7a* functions in NC cells.** (A) *Lmo7a* promotes proper assembly of the Pxn-FA complex in coordination with a Cadherin- $\beta$ -Cat complex similar to a classical adherens junction. Both associate with elements of the actin cytoskeleton. (B) In the absence of *Lmo7a*, the Pxn-FA complex fails to localize correctly and accumulates in the cytoplasm. This also disrupts the Cadherin- $\beta$ -Cat complex, resulting in loss of directional migration and increased free  $\beta$ -Cat levels.

237 **DISCUSSION**

238 NC cells integrate many signals as they migrate to arrive at their final positions and generate the correct  
239 cell types. The gene regulatory network for NC specification and differentiation has been well studied, but  
240 the relationship between NC migration and fate is still poorly understood (Kalcheim and Kumar, 2017).  
241 Here we show novel roles for Lmo7a in regulating both NC migration and lineage specification through its  
242 functions in modulating adhesion and canonical Wnt signaling. This is the first evidence for a role for  
243 Lmo7 in NC development, and given the complex and modular nature of its function in other contexts, we  
244 can hypothesize many potential mechanisms. In our model (Figure 8), Lmo7a serves to direct formation  
245 of FAs in a similar manner to its previously described function in cultured cells (Holaska et al, 2006;  
246 Wozniak et al, 2013). Loss of Lmo7a would then interfere with formation of the Pxn-FA complex at the  
247 membrane, thereby disrupting the ability of NC cells to migrate in a coordinated manner. This is  
248 consistent with its highly restricted expression to migrating NC cells as well as its subcellular localization  
249 to the membrane where it regulates Pxn localization. We hypothesize that this loss of proper Pxn-FA  
250 formation may disrupt a complex similar to the recently described NC Cadherin11-FA complex, which  
251 includes Pxn and  $\beta$ -cat (Langhe et al, 2016), thereby increasing the amount of free  $\beta$ -cat in the cell and  
252 consequently elevating canonical Wnt signaling (Figure 8). This would be consistent with previously  
253 described roles for Lmo7 in regulating FA formation (Wozniak et al 2013) and in linking cadherins to  
254 afadin-nectin junctions (Ooshio et al, 2004).

255

256 **Lmo7a regulates NC cell migration and FA localization**

257 Lmo7 has been implicated in muscle and epithelial development as well as cancer metastasis. The  
258 mechanism of its function and its subcellular localization differ in each of these contexts. In muscle, Lmo7  
259 interacts with transcriptional regulators in the nucleus, while in normal epithelia and breast cancer cells it  
260 interacts with transmembrane signaling molecules and the actin cytoskeleton (Holaska et al, 2006;  
261 Dedeic et al, 2011; Ooshio et al., 2004; Nakamura et al, 2005; Hu et al, 2011, Teixeira et al, 2014). A  
262 large number of alternatively spliced Lmo7 transcripts have been identified, which further increases the  
263 range of this multifaceted protein's potential functions.



264 We found that an sfGFP-Lmo7a fusion protein localized to the plasma membrane of zebrafish NC  
265 cells, with no detectable expression in the nucleus. In addition,, injection of mRNA encoding an Lmo7a  
266 protein lacking the Lim domain rescued NC migration at similar levels to full length mRNA, while mRNA  
267 lacking the CH domain did not. CH domains are well known to mediate interactions with the cytoskeleton  
268 through binding with F-actin (Korenbaum and Rivero, 2002). Taken together these results strongly  
269 suggest a role for Lmo7a at the membrane, perhaps similar to its role in connecting the cytoskeleton to  
270 adherens junctions in epithelial cells (Ooshio et al, 2004).

271 In breast cancer cells, Lmo7 functions to modify the cytoskeleton and promote transcription of  
272 metastatic genes. Consistent with a similar structural role for Lmo7a in NC cells, we found mislocalization  
273 and aggregation of Pxn, an essential scaffolding protein for FA formation. Directional FAs have been  
274 observed in NC cells cultured in vitro (Toro-Tapia, et al, 2018), and proper FA-Integrin (Itg) signaling is  
275 crucial for directed NC migration and cardiac outflow tract formation in vivo (Dai et al, 2013). LIMCH1, a  
276 related protein with a very similar domain structure as Lmo7, controls cell migration by regulating FA  
277 formation and actomyosin dynamics (Lin et al, 2017). Lmo7 itself has been shown to localize to FAs and  
278 act as a shuttling protein to mediate Itg signaling in HeLa cells and mouse embryonic fibroblasts  
279 (Wozniak et al, 2013). The essential nature of its CH domain in NC migration supports this notion, as CH  
280 domains have been found to bind Pxn (Sjöblom et al, 2008). Our results suggest a role for Lmo7a in  
281 promoting NC cell migration through regulation of FA dynamics. This requirement appears to be specific  
282 to subsets of NC cells. This finding is similar to loss of Fscn1-dependant filopodia in premigratory NC  
283 cells, which leads to a loss of ventrolateral migration of subsets of NC cells (Boer et al, 2015). The  
284 selective loss of NC migration in *lmo7a*-deficient embryos reinforces the notion that requirements for  
285 specific migratory regulators are heterogeneous in the NC and possibly lineage-specific. This is an  
286 exciting avenue for research into the in vivo relationship between FAs and NC migration and lineage  
287 decisions.

288

### 289 **NC aggregates elevate Wnt signaling secondary to a loss of migratory capacity**

290 After NC migration at 24 hpf, unmigrated NC aggregates in *lmo7a*-deficient embryos display high levels of  
291 Wnt signaling as measured using both the transgenic Wnt reporter, *Tg(7xTCF:EGFP)* and nuclear  $\beta$ -cat

292 protein. This may have important consequences both for the migratory behaviors as well as the fates of  
293 the cells. By this stage most wild-type NC cells as well as migrated NC cells in *lmo7a*-deficient embryos  
294 have significantly downregulated Wnt signaling. In addition to its roles in NC induction and migration, Wnt  
295 signaling also regulates the fate decision between pigment and glial lineages. Bipotential pigment/glial  
296 progenitors downregulate *foxd3* and upregulate *mitfa* in response to elevated Wnt, biasing them toward a  
297 pigment cell fate (Curran et al, 2010). Surprisingly, despite high levels of Wnt signaling, the NC  
298 aggregates in *lmo7a*-deficient embryos express both *foxd3* and *mitfa*, often in the same cells. This is in  
299 contrast to previous findings showing that when either *rbc3a/dmxi2* or *ovol1a* are eliminated, NC cells  
300 aggregate at the dorsal midline, upregulate responses to Wnt, and all become pigment cells.  
301 Furthermore, chemical inhibition of Wnt signaling in *lmo7a*-deficient embryos fails to rescue NC migration  
302 or prevent *mitfa* expression in aggregates, indicating that the increase in Wnt signaling is insufficient to  
303 explain either aspect of the *lmo7a*-deficient phenotype. This is a negative result, and it is possible that the  
304 timing or effectiveness of the Wnt inhibition was not sufficient to fully block the effects of increased Wnt  
305 signaling. Comparative analysis with other known Wnt-regulatory mutants may help to disentangle the  
306 effects on migration and lineage specification.

307         How these functions of *Lmo7a* in adhesion lead to specific effects on distinct NC derivatives is  
308 less clear. Either *Lmo7a* functions to regulate the pigment/glial fate decision directly, or it may affect  
309 migration of a subset of NC cells that is distinct from the populations affected by *rbc3a/dmxi2* and *ovol1a*.  
310 NC aggregates in *lmo7a*-deficient embryos appear strikingly similar to loss of *rbc3a* or *ovol1*, yet distinct  
311 in that they contain both pigment and glial progenitors (Piloto and Schilling, 2009; Tuttle et al, 2014). In  
312 the case of *ovol1a*, the migration defect observed in NC cells showed a clearly correlates with elevated  
313 Wnt signaling through downstream Wnt effector genes and adoption of pigment cell fate. Similarly, in the  
314 case of *rbc3a/dmxi2*, effects on trafficking of Frizzled-7 receptors correlates with elevated nuclear  $\beta$ -cat  
315 and pigment cell identity. However, our results with *lmo7a* call into question a direct connection between  
316 NC aggregation, Wnt signaling and lineage specification. It is possible that this reflects either differential  
317 premigratory positioning of cells affected in each context or some yet unknown secondary transcriptional  
318 roles for one or more of these genes. Comparative transcriptomic analyses may help to resolve these  
319 differences, and further elucidate the distinct roles of these novel regulators in NC development. Our

320 results continue to underscore the complex nature of the manifold roles for Wnt signaling in NC  
321 development.

322

### 323 **Conserved roles for Lmo7 in coordinating cell migration and fate**

324 Cells that undergo EMT and migrate require a spatiotemporal balance of several interconnected cellular  
325 processes including signal transduction, actomyosin activity, and FA assembly/disassembly. Taken  
326 together, our results suggest that Lmo7a forms a novel link between these processes in migrating NC  
327 cells. While previous work has shown important roles for Lmo7 in regulating cell-cell junctions in epithelial  
328 cells (Ooshio et al, 2004; Du et al, 2019) we propose novel roles for Lmo7a in Wnt signaling in NC cells  
329 as well as in cell migration through regulation of Pxn-FAs (Figure 7). Similarly migration of mesenchymal  
330 stem cells (MSCs) and their commitment to form osteoblasts are both regulated by cytoskeletal  
331 reorganization through FAs and Itgs (Khang et al, 2012; He et al, 2016), under the control of canonical  
332 Wnt signaling (He et al, 2018).

333 Mammalian Lmo7 has been shown to localize to FAs and influence Itg signaling in vitro (Holaska  
334 et al, 2006; Wozniak et al, 2013) and its relative, LIMCH1, regulates FA formation and actomyosin  
335 dynamics (Lin et al, 2017). Both are associated with increased cancer metastasis (Kang et al, 2000;  
336 Furuya et al, 2002; Sasaki et al, 2003; Nakamura et al, 2005; Hu et al, 2011, Teixeira et al, 2014). While  
337 mammalian Lmo4 has been implicated in NC and cancer EMT, by directly regulating Snail and Slug, it is  
338 both structurally and functionally quite distinct from Lmo7 (Ochoa et al, 2012; Ferronha et al, 2013). Lmo7  
339 may have gained a specific role in NC cells in regulating the association of Pxn and FAs with the actin  
340 cytoskeleton during migration, as well as linking these to Cdh and  $\beta$ -cat membrane/nuclear ratios, thereby  
341 indirectly influencing Wnt signaling. Future studies should examine if LMO7 plays a role in cell migration  
342 in other embryonic cells in which it is expressed (e.g. axial mesoderm that forms the notochord) and as a  
343 potential therapeutic target in cancer metastasis.

344

345

346

347 **Supplementary Movie 1. Migration of NC cells in WT embryo.** NC cells labeled with Sox10:nEOS.  
348 Embryo imaged from 12-20 hpf at 5 min intervals. NC cells migrate away from the dorsal midline and into  
349 the pharyngeal arches. Scale bar = 100  $\mu$ m

350  
351 **Supplementary Movie 2. Migration and formation of aggregates in *lmo7a*-deficient embryo.** NC  
352 cells labeled with Sox10:nEOS. Embryo imaged from 12-20 hpf at 5 min intervals. Most NC cells migrate  
353 away from the dorsal midline. Subsets of NC cells display non-directional movement and eventually  
354 aggregate at the midline. Scale bar = 100  $\mu$ m

355  
356 **Supplementary Movie 3. Paxillin accumulation in aggregate NC cells in *lmo7a*-deficient embryos.**  
357 NC cells labeled with Sox10:lyn-TdTomato and express Pxn-EGFP. *lmo7a* MO-injected embryos imaged  
358 from 16-19 hpf as NC cells aggregate at the dorsal midline. Some cells display accumulation of Pxn-  
359 EGFP in the cytoplasm.

360

361

362

## 363 **Materials and Methods**

### 364 **Zebrafish husbandry and transgenic lines**

365 Embryos were obtained from natural breeding and staged as described in Kimmel et al, 1995. All  
366 zebrafish lines were maintained according to standard protocols (Westerfield et al, 2000). Transgenic  
367 lines used in this study include *Tg(-4.9sox10:nEOS)<sup>w18</sup>* (Curran et al, 2010), *Tg(-4.9sox10:lyn-*  
368 *tdTomato)<sup>ir1040</sup>* (Schilling et al, 2010), *Tg(-4.9sox10:lyn-EGFP)<sup>ir866</sup>* (Schilling et al, 2010), *Tg(-*  
369 *7.2sox10:EGFP)<sup>ir937</sup>* (Wada et al, 2005; Hoffman et al, 2010), *Tg( $\beta$ -actin:Pxn-EGFP)<sup>mai1</sup>* (Goody et al, 2010),  
370 *Tg(7XTCF:EGFP)<sup>ia4</sup>* (Moro et al, 2012), and *Tg(7XTCF:nls-mCherry)<sup>ia5</sup>* (Moro et al, 2012). HCR, chemical  
371 inhibition, and WNT-reporter analysis experiments were performed in double transgenic embryos derived  
372 from crosses of *Tg(7XTCF:EGFP)<sup>ia4</sup>* to *Tg(-4.9sox10:lyn-tdTomato)<sup>ir1040</sup>*. For Pxn-EGFP live imaging,  
373 *Tg( $\beta$ -actin:Pxn-EGFP)<sup>mai1</sup>* was crossed to *Tg(-4.9sox10:lyn-tdTomato)<sup>ir1040</sup>* and double-transgenic progeny  
374 were analyzed. For live imaging, embryos were mounted in 1% low-melt agarose dissolved in embryo  
375 medium containing 1% tricaine. Images were taken on either a Nikon C1 confocal or a Leica SP8  
376 confocal. Time-lapsed movies were made on a Nikon C1 confocal using a heated stage held at 28.5°C.  
377 Images were processed using ImageJ (NIH).

378 **In situ hybridization and hybridization chain reaction**

379 A 291 bp clone corresponding to a retained intron in the *lmo7a* genomic locus, was obtained from  
380 OpenBiosystems (EST BI845812) and used to generate an antisense DIG-labeled probe, which was then  
381 used for ISH as previously described (Thisse and Thisse, 2008). *foxd3*, *mitfa*, and *dlx2a* HCR probes  
382 were ordered from Molecular Technologies (Los Angeles, CA) using the accession numbers  
383 NM\_131290.2, NM\_130923.2, and NM\_131311.2 respectively. Whole mount HCR was carried out as  
384 described (Choi et al. 2014).

385

386 **Immunohistochemistry**

387 For  $\beta$ -cat staining, embryos were fixed in 4% paraformaldehyde (PFA) for 1.5 hours at room temperature,  
388 permeabilized in PBS/1%Triton-x/1%DMSO for 1 hour at room temperature (RT), washed with  
389 PBS/0.1%Triton-x/1%DMSO, and blocked with 5% Donkey Serum for 1 hour at RT. Embryos were then  
390 incubated overnight at 4°C with 1:200  $\beta$ -cat antibody (GeneTex) in block. For pFAK stains, embryos  
391 embryos were fixed in 4% PFA for 1 hour at room temperature, permeabilized in acetone at -20°C for 5  
392 minutes and then PBS/1%Triton-x/1%DMSO for 30 minutes at RT, washed with PBS/0.1%Triton-  
393 x/1%DMSO, and blocked with 5% Donkey Serum/2% BSA for 1 hour at RT. Embryos were then  
394 incubated overnight with 1:200 pFAK antibody (Invitrogen) in block. For concentrations and catalog  
395 numbers of primary and secondary antibodies see supplementary table 8.

396

397 **Molecular cloning**

398 Coding sequences of *lmo7a* were amplified from cDNA isolated from 16 hpf zebrafish embryos. cDNA  
399 was generated using Protoscript II First Strand Synthesis Kit (New England Biolabs). *lmo7a* rescue  
400 constructs and *lmo7a*:sfGFP fusion constructs were generated by Gibson Assembly (Gibson et al, 2009)  
401 into the pCS2+ vector. For primer sequences used see Supplementary Table 1.

402

403

404

405

#### 406 **Morpholino and mRNA microinjections**

407 Antisense morpholino oligonucleotide (MO) targeting *Imo7a* (5'-TCGCCACTCCATCACCGGTCAACGT-  
408 3') and Control MO (Gene Tools) were dissolved in nanopure water prior to injection. For all mRNA  
409 injection experiments, mRNAs were transcribed in vitro using the mMessage mMachine kit (Ambion). All  
410 injections were performed at the 1-cell stage, and a volume of 1 nl was injected in all cases. For XAV939  
411 treatment experiments, *Imo7a* MO was injected at 3 ng/embryo because of DMSO and XAV939 toxicity.  
412 For all other experiments, it was injected at 4 ng/embryo. Control MO was injected at 4 ng/embryo. In all  
413 cases, 400 pg of mRNA was injected.

414

#### 415 **CRISPR and CRISPRi gRNA**

416 For CRISPR-Cas9 injections, templates were generated using a different scaffold chimeric primer design  
417 (Varshney et al, 2015) and multiple target-specific primers as described (Wu et al, 2018). gRNAs were  
418 then synthesized using T7 MegaShortScript kit (Ambion). gRNAs were incubated with Cas9 protein (IDT)  
419 at 37°C for 5 minutes and injected into embryos at the 1-cell stage. 150 pg gRNA and 800 pg Cas9  
420 protein were injected.

421 For CRISPRi injections, templates for gRNAs were generated by PCR using the scaffold chimeric primer  
422 design (Larson et al, 2013) and a target-specific primer containing a T7 promoter sequence. *dCas9*  
423 mRNA was synthesized from the pT3T-nls-dCas9-nls plasmid (Rossi et al, 2015) using mMessage  
424 mMachine kit (Ambion). *dCas9* mRNA was coinjected with gRNAs targeting multiple sites along the  
425 *Imo7a* coding region. 75 pg gRNAs and 450 pg *dcas9* mRNA were injected.

426

#### 427 **Genotyping**

428 The CRISPR-Cas9 induced  $\Delta 5$  and  $\Delta 35$  deletions were identified by PCR of gDNA isolated from  
429 individual juvenile fish using primers targeting Exon16 of the *Imo7a* genomic locus. Heterozygous F1 fish  
430 were incrossed to generate transheterozygous F2 fish.

431

432



433 **Quantitative RT-PCR**

434 For qPCR, total RNA was extracted from biological triplicates of de-yolked CRISPRi-injected and *dCas9*-  
435 injected control embryos using trizol (Invitrogen) and purified using Direct-zol RNA Miniprep kit (Zymo).  
436 cDNA was generated using Protoscript II First Strand cDNA Synthesis kit (New England Biolabs). cDNAs  
437 were diluted 1:20 and then qPCR was carried out in triplicate using the Luna Universal qPCR Master Mix  
438 (New England Biolabs). 3 primer sets targeted different exon-exon junctions in the *lmo7a* coding region  
439 and primers targeting *rps13a* as the control housekeeping gene were used for normalization. qPCR was  
440 performed on a LightCycler 480 (Roche). Fold changes were determined by calculating  $\Delta\Delta CT$  values for  
441 each biological replicate. For qPCR primer sequences see Supplementary Table.

442 **Chemical inhibition of Wnt signaling**

443 For chemical inhibition of Wnt signaling, embryos were treated with GSK3-stabilizer XAV939 (StemCell  
444 Technologies). At 12 hpf, embryos were selected for expression of *sox10:lyn-tdTomato* and *7xTCF:EGFP*  
445 and then placed in embryo media containing either 100  $\mu$ M XAV939 in 0.5mM DMSO or 0.5mM DMSO  
446 alone and incubated at 28.5°C for 12 hours.

447 **Statistical analyses**

448 For mRNA rescues, medians were compared using Kruskal-Wallis ANOVA and posthoc Wilcoxon tests.  
449 For  $\beta$ -cat and pFAK stains, normal distribution assumptions were tested using Shapiro-Wilk tests and  
450 means were compared using Welch's two sample T-tests. Statistical tests were carried out using R, and  
451 plots were generated in R using the ggplot2 package. Other R packages used include: plyr, dplyr,  
452 reshape2, ggpubr, ggsignif, FSA, plotly, plotrix, and gridExtra. For R markdown files including all code  
453 used for analysis and visual representation of data see Statistics Code.

454

455

456

457 **Acknowledgements**

458 We would like to thank Michael T Green's laboratory at UCI for providing sfGFP plasmids, Francesco  
459 Argenton's laboratory at University of Padova for providing 7xTCF transgenics, and Clarissa Henry's  
460 laboratory at University of Maine for providing pxn-GFP transgenics. We are grateful for the technical and  
461 critical input from members of the Schilling laboratory.  
462

463 **Author Contributions**

464 The authors have made the following declarations about their contributions:

465 David Tatarakis: Conceptualization, Data curation, Formal analysis, Validation, Investigation,  
466 Visualization, Methodology, Writing – original draft, Writing – review and editing, Project Administration.  
467

468 Adam Tuttle: Conceptualization, Initial investigation, Writing – review and editing.

469 Thomas F. Schilling: Conceptualization, Resources, Data curation, Supervision, Funding acquisition,  
470 Writing – review and editing, Project Administration.  
471

472 **Competing Interests**

473 The authors declare no competing interests.  
474

475 **Funding**

476 NIH (DE023050)

477 NIH (DE13828)

478

479 **REFERENCES**

- 480 McBeath, R., Pirone, D. M., Nelson, C. M., Bhadriraju, K., & Chen, C. S. (2004). Cell Shape, Cytoskeletal  
481 Tension, and RhoA Regulate Stem Cell Lineage Commitment. *Developmental Cell*, 6(4), 483–495.  
482 [https://doi.org/10.1016/S1534-5807\(04\)00075-9](https://doi.org/10.1016/S1534-5807(04)00075-9)  
483
- 484 He, J., Zhang, N., Zhang, J., Jiang, B., & Wu, F. (2018). Migration critically mediates osteoblastic  
485 differentiation of bone mesenchymal stem cells through activating canonical Wnt signal pathway. *Colloids  
486 and Surfaces B: Biointerfaces*, 171, 205–213. <https://doi.org/10.1016/j.colsurfb.2018.07.017>  
487
- 488 Kalcheim, C., & Kumar, D. (2017). Cell fate decisions during neural crest ontogeny. *International Journal  
489 of Developmental Biology*, 61(3–4–5), 195–203. <https://doi.org/10.1387/ijdb.160196ck>  
490
- 491 Stuhlmeier, T. J., & García-Castro, M. I. (2012). Current perspectives of the signaling pathways directing  
492 neural crest induction. *Cellular and Molecular Life Sciences*, 69(22), 3715–3737.  
493 <https://doi.org/10.1007/s00018-012-0991-8>  
494
- 495 Thiery, J. P., Aclouque, H., Huang, R. Y. J., & Nieto, M. A. (2009). Epithelial-Mesenchymal Transitions in  
496 Development and Disease. *Cell*, 139(5), 871–890. <https://doi.org/10.1016/j.cell.2009.11.007>  
497
- 498 Mayor, R., & Theveneau, E. (2013). The neural crest. *Development*, 140(11), 2247–2251.  
499 <https://doi.org/10.1242/dev.091751>  
500
- 501 Kerosuo, L., & Bronner-Fraser, M. (2012). What is bad in cancer is good in the embryo: Importance of  
502 EMT in neural crest development. *Seminars in Cell & Developmental Biology*, 23(3), 320–332.  
503 <https://doi.org/10.1016/j.semcd.2012.03.010>  
504
- 505 Fraser, S. E., & Bronner-Fraser, M. (1991). Migrating neural crest cells in the trunk of the avian embryo  
506 are multipotent. *Development*, 112(4), 913–920.  
507
- 508 Dupin, E., Calloni, G. W., & Douarin, N. M. L. (2010). The cephalic neural crest of amniote vertebrates is  
509 composed of a large majority of precursors endowed with neural, melanocytic, chondrogenic and  
510 osteogenic potentialities. *Cell Cycle*, 9(2), 238–249. <https://doi.org/10.4161/cc.9.2.10491>  
511
- 512 Baggiolini, A., Varum, S., Mateos, J. M., Bettosini, D., John, N., Bonalli, M., Ziegler, U., Dimou, L.,  
513 Clevers, H., Furrer, R., & Sommer, L. (2015). Premigratory and migratory neural crest cells are  
514 multipotent in vivo. *Cell Stem Cell*, 16(3), 314–322. <https://doi.org/10.1016/j.stem.2015.02.017>  
515

- 516 Schilling, T. F., & Kimmel, C. B. (1994). Segment and cell type lineage restrictions during pharyngeal arch  
517 development in the zebrafish embryo. *Development*, *120*(3), 483–494.  
518
- 519 Krispin, S., Nitzan, E., Kassem, Y., & Kalcheim, C. (2010). Evidence for a dynamic spatiotemporal fate  
520 map and early fate restrictions of premigratory avian neural crest. *Development (Cambridge, England)*,  
521 *137*(4), 585–595. <https://doi.org/10.1242/dev.041509>  
522
- 523 Nakagawa, S., & Takeichi, M. (1998). Neural crest emigration from the neural tube depends on regulated  
524 cadherin expression. *Development*, *125*(15), 2963–2971.  
525
- 526 Borchers, A., David, R., & Wedlich, D. (2001). *Xenopus* cadherin-11 restrains cranial neural crest  
527 migration and influences neural crest specification. *Development (Cambridge, England)*, *128*(16), 3049–  
528 3060.  
529
- 530 Morrison, J. A., McLennan, R., Wolfe, L. A., Gogol, M. M., Meier, S., McKinney, M. C., Teddy, J. M.,  
531 Holmes, L., Semerad, C. L., Box, A. C., Li, H., Hall, K. E., Perera, A. G., & Kulesa, P. M. (2017). Single-  
532 cell transcriptome analysis of avian neural crest migration reveals signatures of invasion and molecular  
533 transitions. *ELife*, *6*, e28415. <https://doi.org/10.7554/eLife.28415>  
534
- 535 Lukoseviciute, M., Gavriouchkina, D., Williams, R. M., Hochgreb-Hagele, T., Senanayake, U., Chong-  
536 Morrison, V., Thongjuea, S., Repapi, E., Mead, A., & Sauka-Spengler, T. (2018). From Pioneer to  
537 Repressor: Bimodal *foxd3* Activity Dynamically Remodels Neural Crest Regulatory Landscape In Vivo.  
538 *Developmental Cell*, *47*(5), 608–628.e6. <https://doi.org/10.1016/j.devcel.2018.11.009>  
539
- 540 Soldatov, R., Kaucka, M., Kastriti, M. E., Petersen, J., Chontorotzea, T., Englmaier, L., Akkuratova, N.,  
541 Yang, Y., Häring, M., Dyachuk, V., Bock, C., Farlik, M., Piacentino, M. L., Boismoreau, F., Hilscher, M. M.,  
542 Yokota, C., Qian, X., Nilsson, M., Bronner, M. E., ... Adameyko, I. (2019). Spatiotemporal structure of cell  
543 fate decisions in murine neural crest. *Science*, *364*(6444), eaas9536.  
544 <https://doi.org/10.1126/science.aas9536>  
545
- 546 Dorsky, R. I., Moon, R. T., & Raible, D. W. (1998). Control of neural crest cell fate by the Wnt signalling  
547 pathway. *Nature*, *396*(6709), 370–373. <https://doi.org/10.1038/24620>  
548
- 549 Minchin, J. E. N., & Hughes, S. M. (2008). Sequential actions of Pax3 and Pax7 drive xanthophore  
550 development in zebrafish neural crest. *Developmental Biology*, *317*(2), 508–522.  
551 <https://doi.org/10.1016/j.ydbio.2008.02.058>  
552

553 Curran, K., Lister, J. A., Kunkel, G. R., Prendergast, A., Parichy, D. M., & Raible, D. W. (2010). Interplay  
554 between Foxd3 and Mitf regulates cell fate plasticity in the zebrafish neural crest. *Developmental Biology*,  
555 *344*(1), 107–118. <https://doi.org/10.1016/j.ydbio.2010.04.023>  
556

557 Maj, E., Künneke, L., Loresch, E., Grund, A., Melchert, J., Pieler, T., Aspelmeier, T., & Borchers, A.  
558 (2016). Controlled levels of canonical Wnt signaling are required for neural crest migration.  
559 *Developmental Biology*, *417*(1), 77–90. <https://doi.org/10.1016/j.ydbio.2016.06.022>  
560

561 Hutchins, E. J., & Bronner, M. E. (2018). Draxin acts as a molecular rheostat of canonical Wnt signaling  
562 to control cranial neural crest EMT. *J Cell Biol*, *217*(10), 3683–3697.  
563 <https://doi.org/10.1083/jcb.201709149>  
564

565 Ahsan, K., Singh, N., Rocha, M., Huang, C., & Prince, V. E. (2019). Prickle1 is required for EMT and  
566 migration of zebrafish cranial neural crest. *Developmental Biology*, *448*(1), 16–35.  
567 <https://doi.org/10.1016/j.ydbio.2019.01.018>  
568

569 Piloto, S., & Schilling, T. F. (2010). Ovo1 links Wnt signaling with N-cadherin localization during neural  
570 crest migration. *Development*, *137*(12), 1981–1990. <https://doi.org/10.1242/dev.048439>  
571

572 Tuttle, A. M., Hoffman, T. L., & Schilling, T. F. (2014). Rabconnectin-3a Regulates Vesicle Endocytosis  
573 and Canonical Wnt Signaling in Zebrafish Neural Crest Migration. *PLOS Biology*, *12*(5), e1001852.  
574 <https://doi.org/10.1371/journal.pbio.1001852>  
575

576 Hoffman, T. L., Javier, A. L., Campeau, S. A., Knight, R. D., & Schilling, T. F. (2007). Tfp2 transcription  
577 factors in zebrafish neural crest development and ectodermal evolution. *Journal of Experimental Zoology*  
578 *Part B: Molecular and Developmental Evolution*, *308B*(5), 679–691. <https://doi.org/10.1002/jez.b.21189>  
579

580 Li, B., Mackay, D. R., Dai, Q., Li, T. W. H., Nair, M., Fallahi, M., Schonbaum, C. P., Fantès, J., Mahowald,  
581 A. P., Waterman, M. L., Fuchs, E., & Dai, X. (2002). The LEF1/β-catenin complex activates *mov1*, a  
582 mouse homolog of *Drosophila ovo* required for epidermal appendage differentiation. *Proceedings of the*  
583 *National Academy of Sciences*, *99*(9), 6064–6069. <https://doi.org/10.1073/pnas.092137099>  
584

585

586 Matthews, J. M., Lester, K., Joseph, S., & Curtis, D. J. (2013). LIM-domain-only proteins in cancer. *Nature*  
587 *Reviews Cancer*, *13*(2), 111–122. <https://doi.org/10.1038/nrc3418>  
588

589 Sang, M., Ma, L., Sang, M., Zhou, X., Gao, W., & Geng, C. (2014). LIM-domain-only proteins:  
590 Multifunctional nuclear transcription coregulators that interacts with diverse proteins. *Molecular Biology*  
591 *Reports*, 41(2), 1067–1073. <https://doi.org/10.1007/s11033-013-2952-1>  
592

593 Ochoa, S. D., Salvador, S., & LaBonne, C. (2012). The LIM adaptor protein LMO4 is an essential  
594 regulator of neural crest development. *Developmental Biology*, 361(2), 313–325.  
595 <https://doi.org/10.1016/j.ydbio.2011.10.034>  
596

597 Ferronha, T., Rabadán, M. A., Gil-Guiñon, E., Dréau, G. L., Torres, C. de, & Martí, E. (2013). LMO4 is an  
598 Essential Cofactor in the Snail2-Mediated Epithelial-to-Mesenchymal Transition of Neuroblastoma and  
599 Neural Crest Cells. *Journal of Neuroscience*, 33(7), 2773–2783.  
600 <https://doi.org/10.1523/JNEUROSCI.4511-12.2013>  
601

602 Martin, B., Schneider, R., Janetzky, S., Waibler, Z., Pandur, P., Kühl, M., Behrens, J., von der Mark, K.,  
603 Starzinski-Powitz, A., & Wixler, V. (2002). The LIM-only protein FHL2 interacts with  $\beta$ -catenin and  
604 promotes differentiation of mouse myoblasts. *The Journal of Cell Biology*, 159(1), 113–122.  
605 <https://doi.org/10.1083/jcb.200202075>  
606

607 Hamidouche, Z., Haÿ, E., Vaudin, P., Charbord, P., Schüle, R., Marie, P. J., & Fromigué, O. (2008). FHL2  
608 mediates dexamethasone-induced mesenchymal cell differentiation into osteoblasts by activating Wnt/ $\beta$ -  
609 catenin signaling-dependent Runx2 expression. *The FASEB Journal*, 22(11), 3813–3822.  
610 <https://doi.org/10.1096/fj.08-106302>  
611

612 Holaska, J. M., Rais-Bahrami, S., & Wilson, K. L. (2006). Lmo7 is an emerin-binding protein that regulates  
613 the transcription of emerin and many other muscle-relevant genes. *Human Molecular Genetics*, 15(23),  
614 3459–3472. <https://doi.org/10.1093/hmg/ddl423>  
615

616 Dedeic, Z., Cetera, M., Cohen, T. V., & Holaska, J. M. (2011). Emerin inhibits Lmo7 binding to the Pax3  
617 and MyoD promoters and expression of myoblast proliferation genes. *J Cell Sci*, 124(10), 1691–1702.  
618 <https://doi.org/10.1242/jcs.080259>  
619

620 Ooshio, T., Irie, K., Morimoto, K., Fukuhara, A., Imai, T., & Takai, Y. (2004). Involvement of LMO7 in the  
621 Association of Two Cell-Cell Adhesion Molecules, Nectin and E-cadherin, through Afadin and  $\alpha$ -Actinin in  
622 Epithelial Cells. *Journal of Biological Chemistry*, 279(30), 31365–31373.  
623 <https://doi.org/10.1074/jbc.M401957200>  
624



- 625 Du, T.-T., Dewey, J. B., Wagner, E. L., Cui, R., Heo, J., Park, J.-J., Francis, S. P., Perez-Reyes, E.,  
626 Guillot, S. J., Sherman, N. E., Xu, W., Oghalai, J. S., Kachar, B., & Shin, J.-B. (2019). LMO7 deficiency  
627 reveals the significance of the cuticular plate for hearing function. *Nature Communications*, *10*(1), 1–15.  
628 <https://doi.org/10.1038/s41467-019-09074-4>  
629
- 630 Nakamura, H., Mukai, M., Komatsu, K., Tanaka-Okamoto, M., Itoh, Y., Ishizaki, H., Tatsuta, M., Inoue, M.,  
631 & Miyoshi, J. (2005). Transforming growth factor-beta1 induces LMO7 while enhancing the invasiveness  
632 of rat ascites hepatoma cells. *Cancer Letters*, *220*(1), 95–99. <https://doi.org/10.1016/j.canlet.2004.07.023>  
633
- 634 Hu, Q., Guo, C., Li, Y., Aronow, B. J., & Zhang, J. (2011). LMO7 mediates cell-specific activation of the  
635 Rho-myocardin-related transcription factor-serum response factor pathway and plays an important role in  
636 breast cancer cell migration. *Molecular and Cellular Biology*, *31*(16), 3223–3240.  
637 <https://doi.org/10.1128/MCB.01365-10>  
638
- 639 Teixeira, V. H., Lourenco, S., Falzon, M., Capitanio, A., Bottoms, S., Carroll, B., Brown, J., George, J. P.,  
640 & Janes, S. M. (2014). S112 Mmp12 And Lmo7 Are Key Genes Involved In The Early Pathogenesis Of  
641 Squamous Cell Carcinoma Of The Lung. *Thorax*, *69*(Suppl 2), A59–A60. [https://doi.org/10.1136/thoraxjnl-](https://doi.org/10.1136/thoraxjnl-2014-206260.118)  
642 [2014-206260.118](https://doi.org/10.1136/thoraxjnl-2014-206260.118)  
643
- 644 Lin, Y.-H., Zhen, Y.-Y., Chien, K.-Y., Lee, I.-C., Lin, W.-C., Chen, M.-Y., & Pai, L.-M. (2017). LIMCH1  
645 regulates nonmuscle myosin-II activity and suppresses cell migration. *Molecular Biology of the Cell*,  
646 *28*(8), 1054–1065. <https://doi.org/10.1091/mbc.e15-04-0218>  
647
- 648 Wozniak, M. A., Baker, B. M., Chen, C. S., & Wilson, K. L. (2013). The emerin-binding transcription factor  
649 Lmo7 is regulated by association with p130Cas at focal adhesions. *PeerJ*, *1*.  
650 <https://doi.org/10.7717/peerj.134>  
651
- 652 Karlsson, T., Kvarnbrink, S., Holmlund, C., Botling, J., Micke, P., Henriksson, R., Johansson, M., &  
653 Hedman, H. (2018). LMO7 and LIMCH1 interact with LRIG proteins in lung cancer, with prognostic  
654 implications for early-stage disease. *Lung Cancer*, *125*, 174–184.  
655 <https://doi.org/10.1016/j.lungcan.2018.09.017>  
656
- 657 Kang, S., Xu, H., Duan, X., Liu, J. J., He, Z., Yu, F., Zhou, S., Meng, X. Q., Cao, M., & Kennedy, G. C.  
658 (2000). PCD1, a novel gene containing PDZ and LIM domains, is overexpressed in several human  
659 cancers. *Cancer Research*, *60*(18), 5296–5302.  
660

- 661 Furuya, M., Tsuji, N., Endoh, T., Moriai, R., Kobayashi, D., Yagihashi, A., & Watanabe, N. (2002). A novel  
662 gene containing PDZ and LIM domains, PCD1, is overexpressed in human colorectal cancer. *Anticancer*  
663 *Research*, 22(6C), 4183–4186.
- 664
- 665 Sasaki, M., Tsuji, N., Furuya, M., Kondoh, K., Kamagata, C., Kobayashi, D., Yagihashi, A., & Watanabe,  
666 N. (2003). PCD1, a novel gene containing PDZ and LIM domains, is overexpressed in human breast  
667 cancer and linked to lymph node metastasis. *Anticancer Research*, 23(3B), 2717–2721.
- 668
- 669 Langhe, R. P., Gudzenko, T., Bachmann, M., Becker, S. F., Gonnermann, C., Winter, C., Abbruzzese, G.,  
670 Alfandari, D., Kratzer, M.-C., Franz, C. M., & Kashef, J. (2016). Cadherin-11 localizes to focal adhesions  
671 and promotes cell–substrate adhesion. *Nature Communications*, 7(1), 1–10.  
672 <https://doi.org/10.1038/ncomms10909>
- 673
- 674 Korenbaum, E., & Rivero, F. (2002). Calponin homology domains at a glance. *Journal of Cell Science*,  
675 115(18), 3543–3545. <https://doi.org/10.1242/jcs.00003>
- 676
- 677 Toro-Tapia, G., Villaseca, S., Beyer, A., Roycroft, A., Marcellini, S., Mayor, R., & Torrejón, M. (2018). The  
678 Ric-8A/Gα13/FAK signalling cascade controls focal adhesion formation during neural crest cell migration  
679 in *Xenopus*. *Development*, 145(22). <https://doi.org/10.1242/dev.164269>
- 680
- 681 Sjöblom, B., Yläne, J., & Djinović-Carugo, K. (2008). Novel structural insights into F-actin-binding and  
682 novel functions of calponin homology domains. *Current Opinion in Structural Biology*, 18(6), 702–708.  
683 <https://doi.org/10.1016/j.sbi.2008.10.003>
- 684
- 685 Dai, X., Jiang, W., Zhang, Q., Xu, L., Geng, P., Zhuang, S., Petrich, B. G., Jiang, C., Peng, L.,  
686 Bhattacharya, S., Evans, S. M., Sun, Y., Chen, J., & Liang, X. (2013). Requirement for integrin-linked  
687 kinase in neural crest migration and differentiation and outflow tract morphogenesis. *BMC Biology*, 11,  
688 107. <https://doi.org/10.1186/1741-7007-11-107>
- 689
- 690 Boer, E. F., Howell, E. D., Schilling, T. F., Jette, C. A., & Stewart, R. A. (2015). Fascin1-Dependent  
691 Filopodia are Required for Directional Migration of a Subset of Neural Crest Cells. *PLOS Genetics*, 11(1),  
692 e1004946. <https://doi.org/10.1371/journal.pgen.1004946>
- 693
- 694 Khang, D., Choi, J., Im, Y.-M., Kim, Y.-J., Jang, J.-H., Kang, S. S., Nam, T.-H., Song, J., & Park, J.-W.  
695 (2012). Role of subnano-, nano- and submicron-surface features on osteoblast differentiation of bone  
696 marrow mesenchymal stem cells. *Biomaterials*, 33(26), 5997–6007.  
697 <https://doi.org/10.1016/j.biomaterials.2012.05.005>

698

699

700 Westerfield (2000). *The zebrafish book. A guide for the laboratory use of zebrafish (Danio rerio)*. Eugene:  
701 University of Oregon Press.

702

703 Goody, M. F., Kelly, M. W., Lessard, K. N., Khalil, A., & Henry, C. A. (2010). Nr2b-mediated NAD<sup>+</sup>  
704 production regulates cell adhesion and is required for muscle morphogenesis in vivo: Nr2b and NAD<sup>+</sup> in  
705 muscle morphogenesis. *Developmental Biology*, *344*(2), 809–826.

706 <https://doi.org/10.1016/j.ydbio.2010.05.513>

707

708 Wada, N., Javidan, Y., Nelson, S., Carney, T. J., Kelsh, R. N., & Schilling, T. F. (2005). Hedgehog  
709 signaling is required for cranial neural crest morphogenesis and chondrogenesis at the midline in the  
710 zebrafish skull. *Development*, *132*(17), 3977–3988. <https://doi.org/10.1242/dev.01943>

711

712 Schilling, T. F., Pabic, P. L., & Hoffman, T. L. (2010). Using transgenic zebrafish (*Danio rerio*) to study  
713 development of the craniofacial skeleton. *Journal of Applied Ichthyology*, *26*(2), 183–186.

714 <https://doi.org/10.1111/j.1439-0426.2010.01401.x>

715

716 Moro, E., Ozhan-Kizil, G., Mongera, A., Beis, D., Wierzbicki, C., Young, R. M., Bournele, D., Domenichini,  
717 A., Valdivia, L. E., Lum, L., Chen, C., Amatruda, J. F., Tiso, N., Weidinger, G., & Argenton, F. (2012). In  
718 vivo Wnt signaling tracing through a transgenic biosensor fish reveals novel activity domains.

719 *Developmental Biology*, *366*(2), 327–340. <https://doi.org/10.1016/j.ydbio.2012.03.023>

720

721 Choi, H. M. T., Beck, V. A., & Pierce, N. A. (2014). Next-Generation in Situ Hybridization Chain Reaction:  
722 Higher Gain, Lower Cost, Greater Durability. *ACS Nano*, *8*(5), 4284–4294.

723 <https://doi.org/10.1021/nn405717p>

724

725 Gibson, D. G., Young, L., Chuang, R.-Y., Venter, J. C., Hutchison, C. A., & Smith, H. O. (2009).

726 Enzymatic assembly of DNA molecules up to several hundred kilobases. *Nature Methods*, *6*(5), 343–345.

727 <https://doi.org/10.1038/nmeth.1318>

728

729 Larson, M. H., Gilbert, L. A., Wang, X., Lim, W. A., Weissman, J. S., & Qi, L. S. (2013). CRISPR  
730 interference (CRISPRi) for sequence-specific control of gene expression. *Nature Protocols*, *8*(11), 2180–

731 2196. <https://doi.org/10.1038/nprot.2013.132>

732

733 Varshney, G. K., Pei, W., LaFave, M. C., Idol, J., Xu, L., Gallardo, V., Carrington, B., Bishop, K., Jones,  
734 M., Li, M., Harper, U., Huang, S. C., Prakash, A., Chen, W., Sood, R., Ledin, J., & Burgess, S. M. (2015).

735 High-throughput gene targeting and phenotyping in zebrafish using CRISPR/Cas9. *Genome Research*,  
736 25(7), 1030–1042. <https://doi.org/10.1101/gr.186379.114>

737

738 Wu, R. S., Lam, I. I., Clay, H., Duong, D. N., Deo, R. C., & Coughlin, S. R. (2018). A Rapid Method for  
739 Directed Gene Knockout for Screening in G0 Zebrafish. *Developmental Cell*, 46(1), 112-125.e4.  
740 <https://doi.org/10.1016/j.devcel.2018.06.003>

741

742 Rossi, A., Kontarakis, Z., Gerri, C., Nolte, H., Hölper, S., Krüger, M., & Stainier, D. Y. R. (2015). Genetic  
743 compensation induced by deleterious mutations but not gene knockdowns. *Nature*, 524(7564), 230–233.  
744 <https://doi.org/10.1038/nature14580>

745

746

747

748

749

750

751

752

753

754

755

756

757

758

759

760

761

762

763

764

765

766 Supplemental Figures

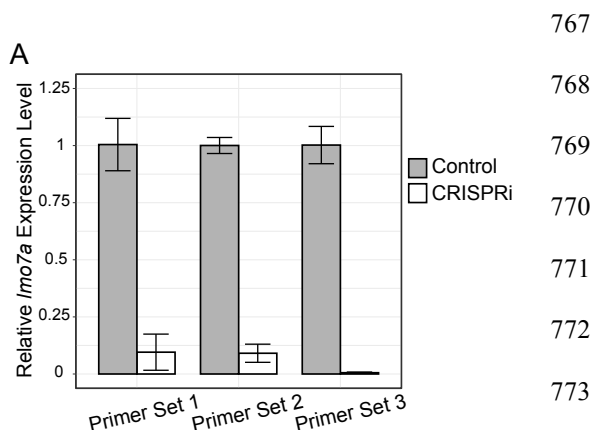

774 **Figure S1: Relative expression of *Imo7a* in CRISPRi embryos.** Bar plots showing expression levels of *Imo7a*  
775 based on qPCR using 3 different primer sets targeting different segments of the coding region. Bars indicate  
776 mean fold change of 3 biological replicates as compared to mean WT expression. Fold changes calculated by  
777 taking  $2^{-\Delta\Delta CT}$  for each replicate. Error bars indicate mean  $\pm$ SD.

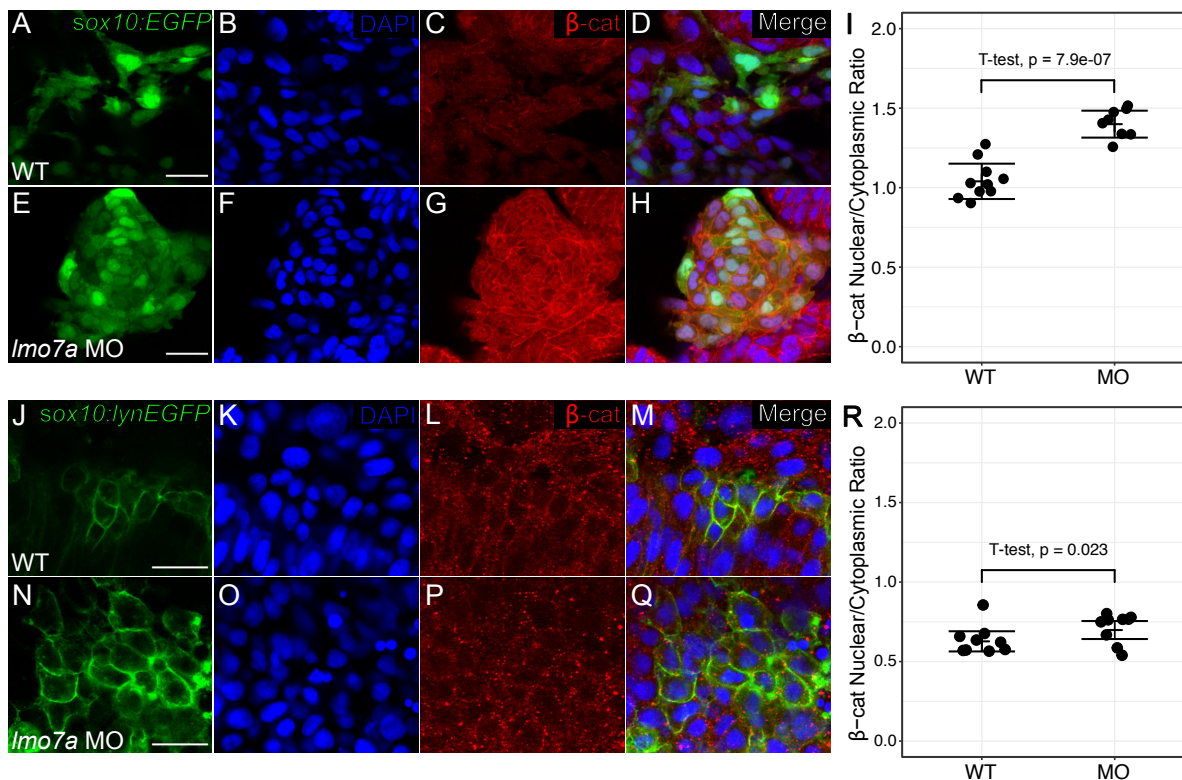

**Figure S2: *Imo7a*-deficient NC aggregates have increased nuclear localization of  $\beta$ -catenin.** (A-H) Whole mount confocal images of immunostaining with anti- $\beta$ -cat antibody (red) and DAPI (blue) in 24 hpf *sox10:EGFP* transgenic embryos (green). (A-D) In migratory NC cells in WT embryos,  $\beta$ -cat staining is both in the nucleus and cytoplasm. (E-H) Aggregate NC cells in *Imo7a* MO-injected embryos display increased nuclear  $\beta$ -cat relative to cytoplasmic staining. (I) Nuclear  $\beta$ -cat levels for each cell were quantified as the mean fluorescence intensity in the nucleus divided by the mean fluorescence intensity in the cytoplasm in 10 individual cells per embryo. (WT n=10 embryos, mean=1.04; *Imo7a* MO n=8 embryos, mean=1.40). T-test p-value=7.913e-07. Line indicates mean. Error bars indicate  $\pm$ SD. (J-Q) Whole mount confocal images of immunostaining with anti- $\beta$ -cat antibody (red) and DAPI (blue) in 12 hpf *sox10:lynEGFP* transgenic embryos (green). Premigratory NC cells in WT embryos (J-M) and in *Imo7a* Mo-injected embryos (N-Q) both display low levels of  $\beta$ -cat staining in the nucleus. (R). (WT n=9 embryos, mean=0.63; *Imo7a* MO n=9 embryos, mean=0.70). T-test p-value=0.023. Line indicates mean. Error bars indicate  $\pm$ SD. Scale bars = 20  $\mu$ m.

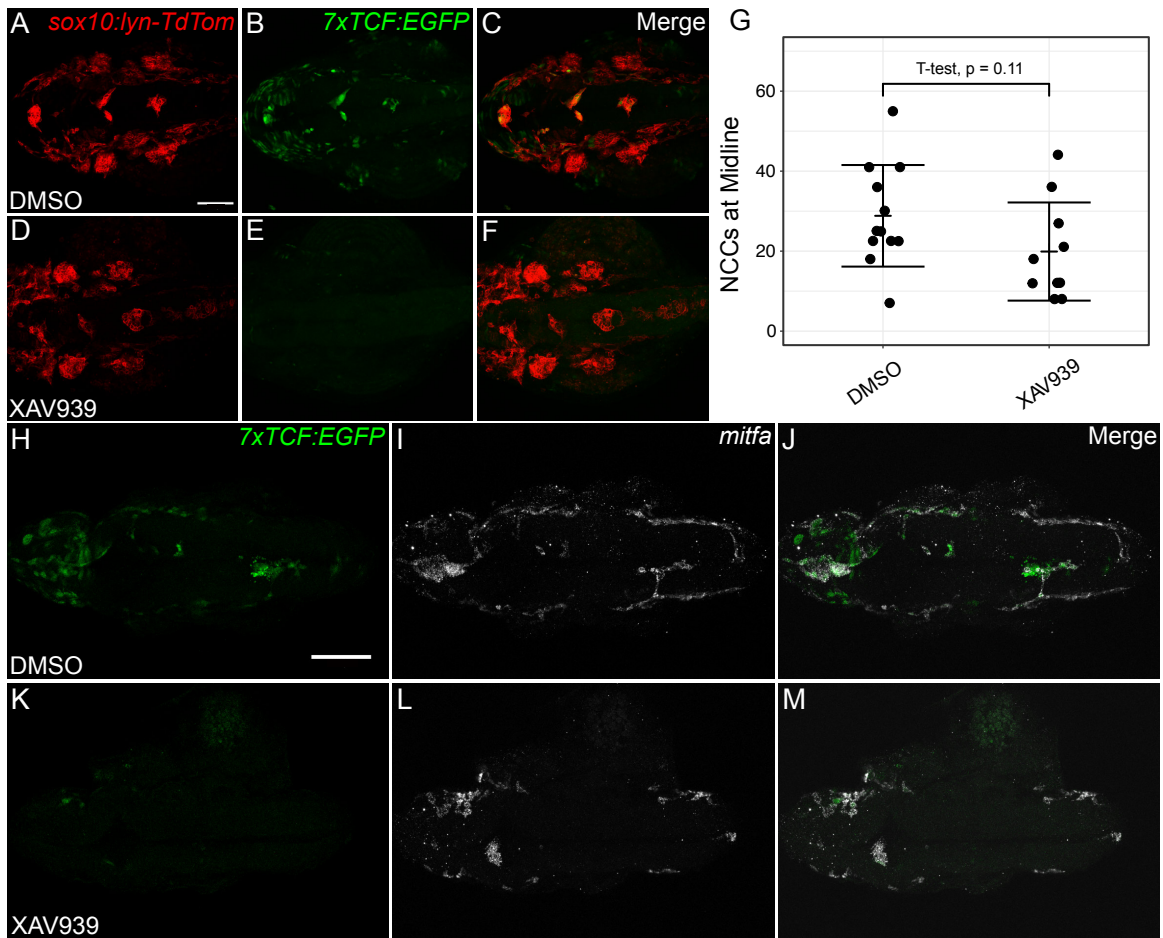

Source: https://www.biorxiv.org/content/10.1101/2020.05.30.125468v1.full.pdf
